# Supplementary material for: High-quality genome assembly of Metaphire vulgaris
Source: PeerJ journal article supplement (doi:10.7717/peerj.10313), 2020-11-12
Supplement: SupFigs_1.pdf [file SupFigs_1.pdf]

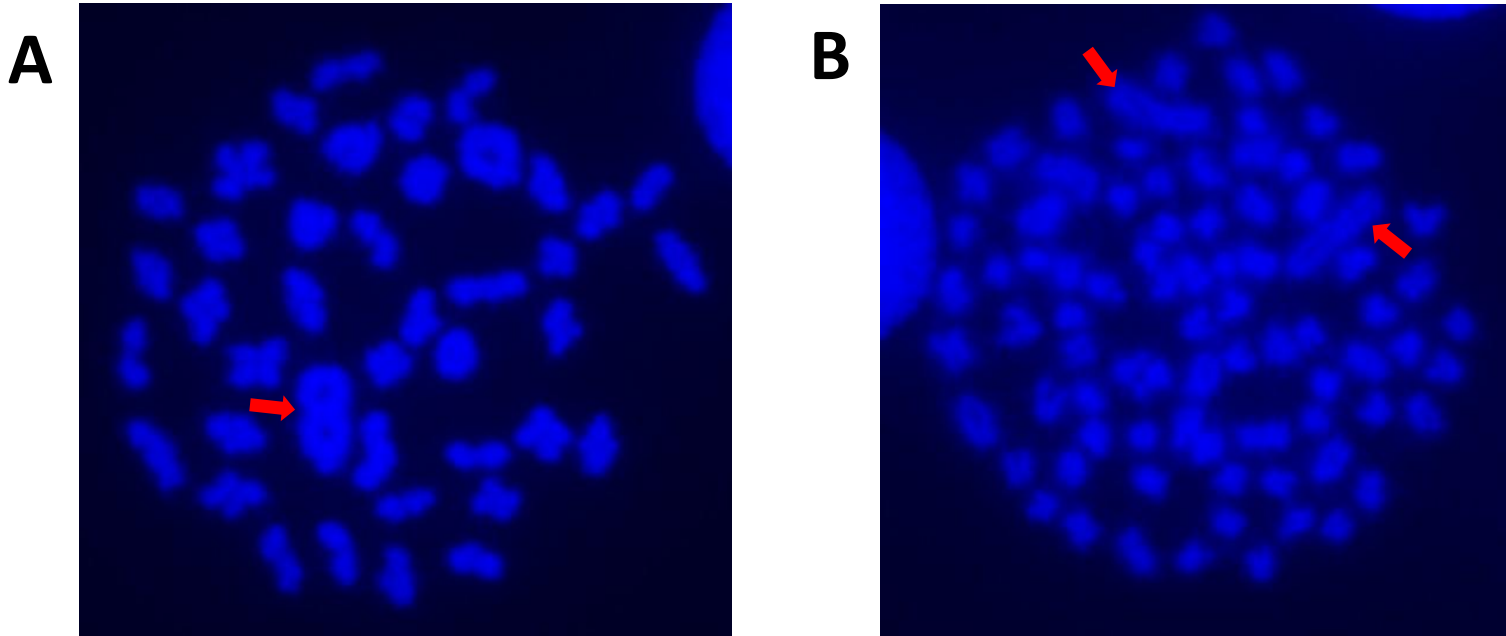

Figure S1. Karyological analysis of *Metaphire vulgaris* showing that there were 41 pairs of chromosomes per cell. The red arrow indicated the largest chromosome. (A) Haploid cell ( $n=41$ ); (B) Diploid cell ( $2n=82$ ).
