# Supplementary material for: High-quality genome assembly of Metaphire vulgaris
Source: PeerJ journal article supplement (doi:10.7717/peerj.10313), 2020-11-12
Supplement: SupFigs_2.pdf [file SupFigs_2.pdf]

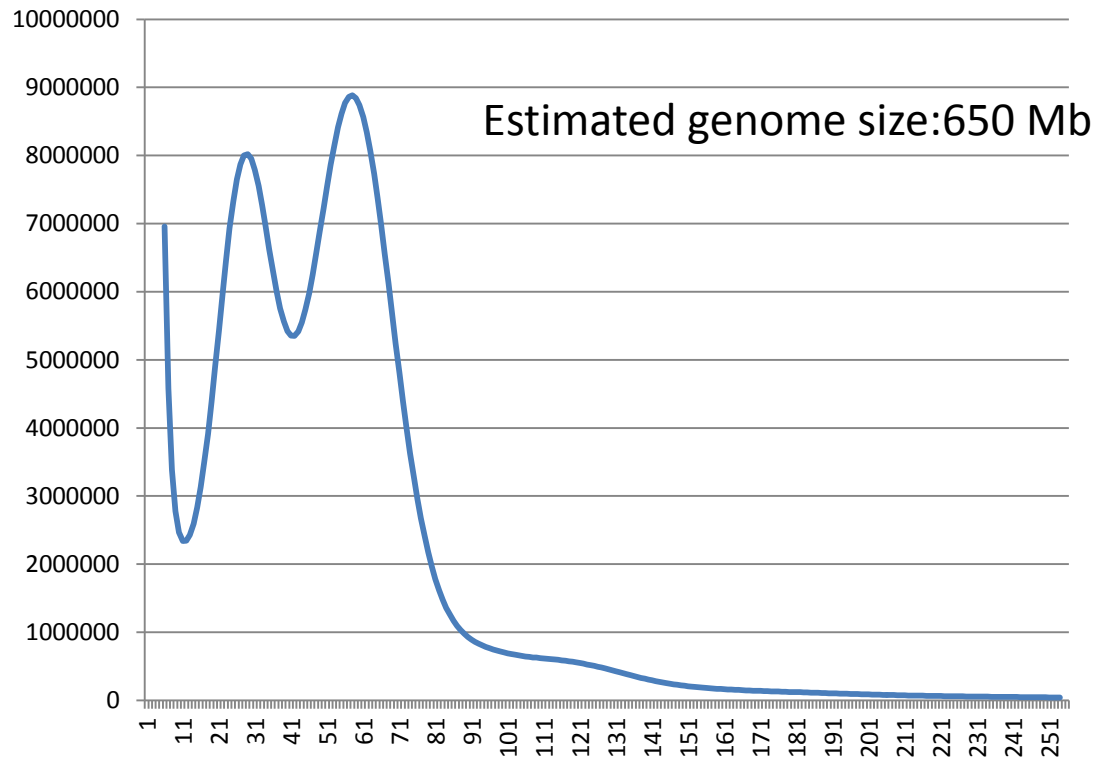

**Figure S2. K-mer distribution of *Metaphire vulgaris* short reads (k=17).** K-mer values were plotted against the frequency (y-axis) at their occurrence (x-axis). The estimated genome size of *M. vulgaris* is about 650 Mb. The left peak showed the high heterozygosity of the genome.
