# Supplementary material for: High-quality genome assembly of Metaphire vulgaris
Source: PeerJ journal article supplement (doi:10.7717/peerj.10313), 2020-11-12
Supplement: SupFigs_3.pdf [file SupFigs_3.pdf]

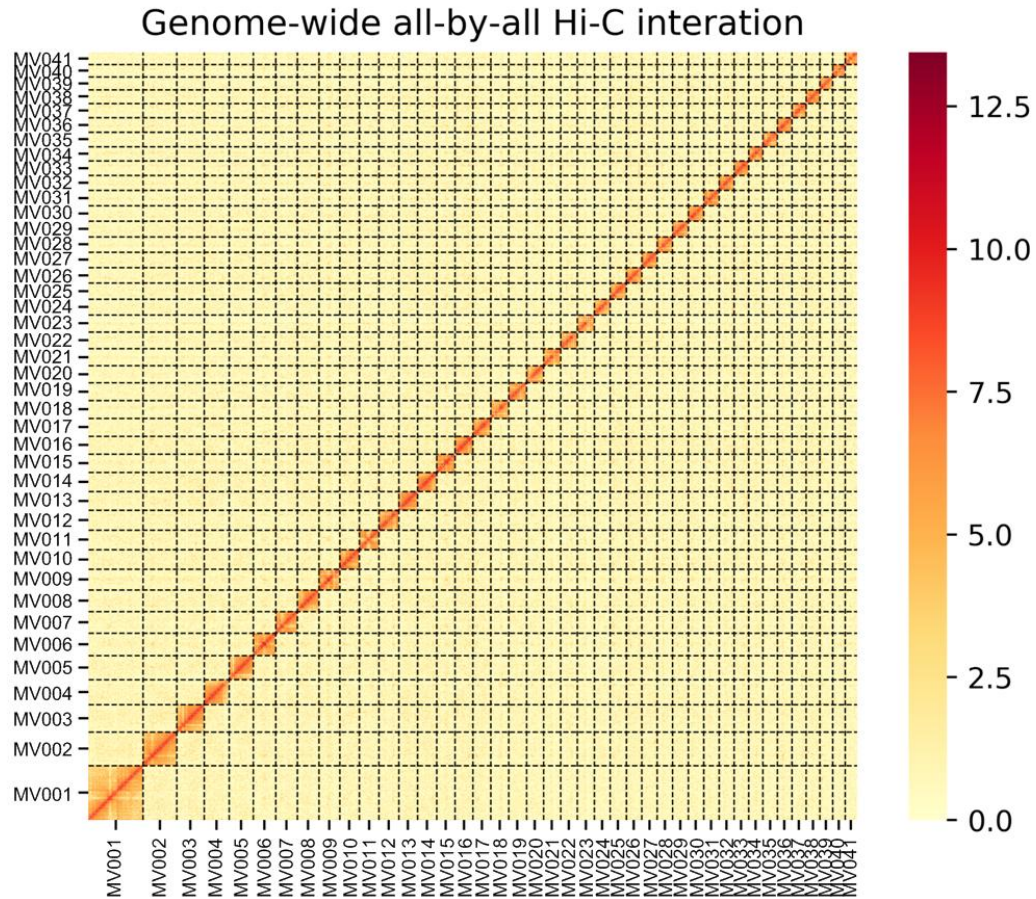

**Figure S3.** Hi-C map of *Metaphire vulgaris* chromosomes showing genome wide chromatin interactions.
