# Supplementary material for: High-quality genome assembly of Metaphire vulgaris
Source: PeerJ journal article supplement (doi:10.7717/peerj.10313), 2020-11-12
Supplement: SupFigs_4.pdf [file SupFigs_4.pdf]

### *M. vulgaris* Chromosomes

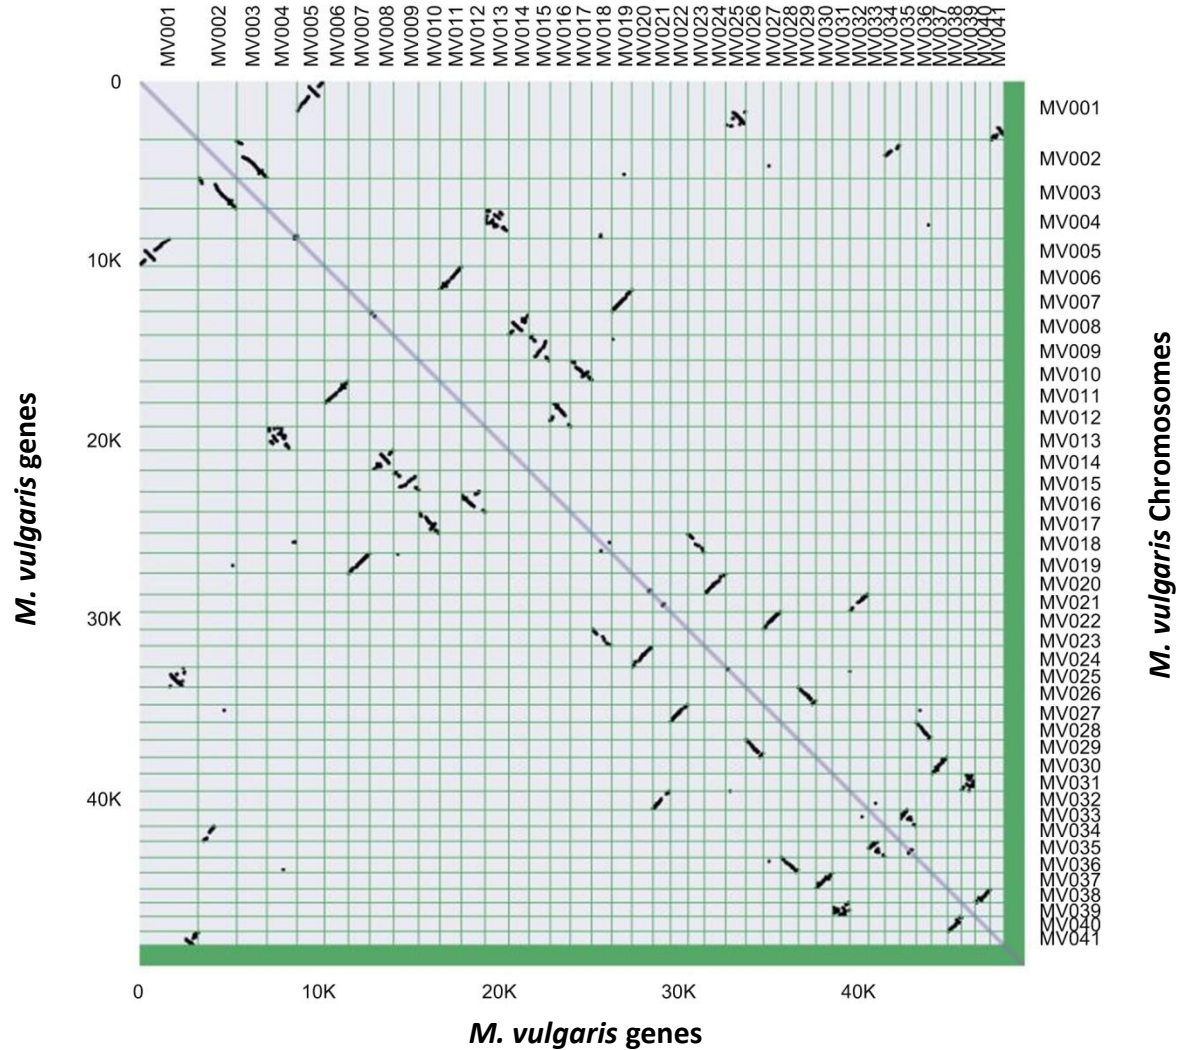

Figure S4. Intra-genomic comparison within *M. vulgaris* by 6,453 gene pairs.
