# Supplementary material for: High-quality genome assembly of Metaphire vulgaris
Source: PeerJ journal article supplement (doi:10.7717/peerj.10313), 2020-11-12
Supplement: SupFigs_5.pdf [file SupFigs_5.pdf]

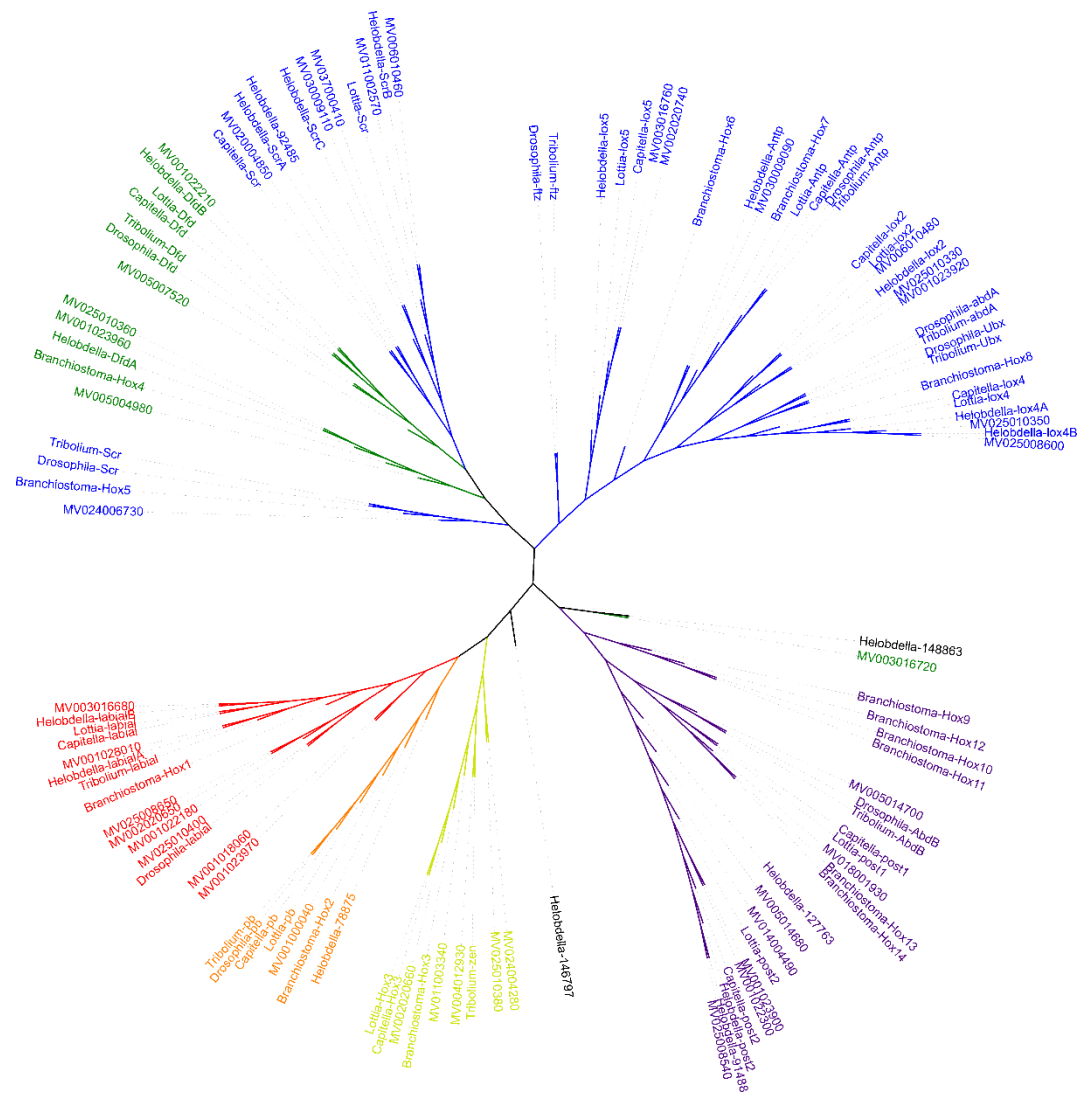

**Figure S5. Forty one Hox genes identified in *M. vulgaris* genome, along with the Hox genes from spiralian genomes. Red, orange, yellow, green, blue, purple were assigned to paralog groups (Hox1, Hox2, Hox3, Hox4, central class and posterior class). MV003016720 in green belonged to Hox4, which was based on the BLASTP hits to NR (Non-Redundant Protein Sequence Database).**
