# Supplementary material for: High-quality genome assembly of Metaphire vulgaris
Source: PeerJ journal article supplement (doi:10.7717/peerj.10313), 2020-11-12
Supplement: SupFigs_6.pdf [file SupFigs_6.pdf]

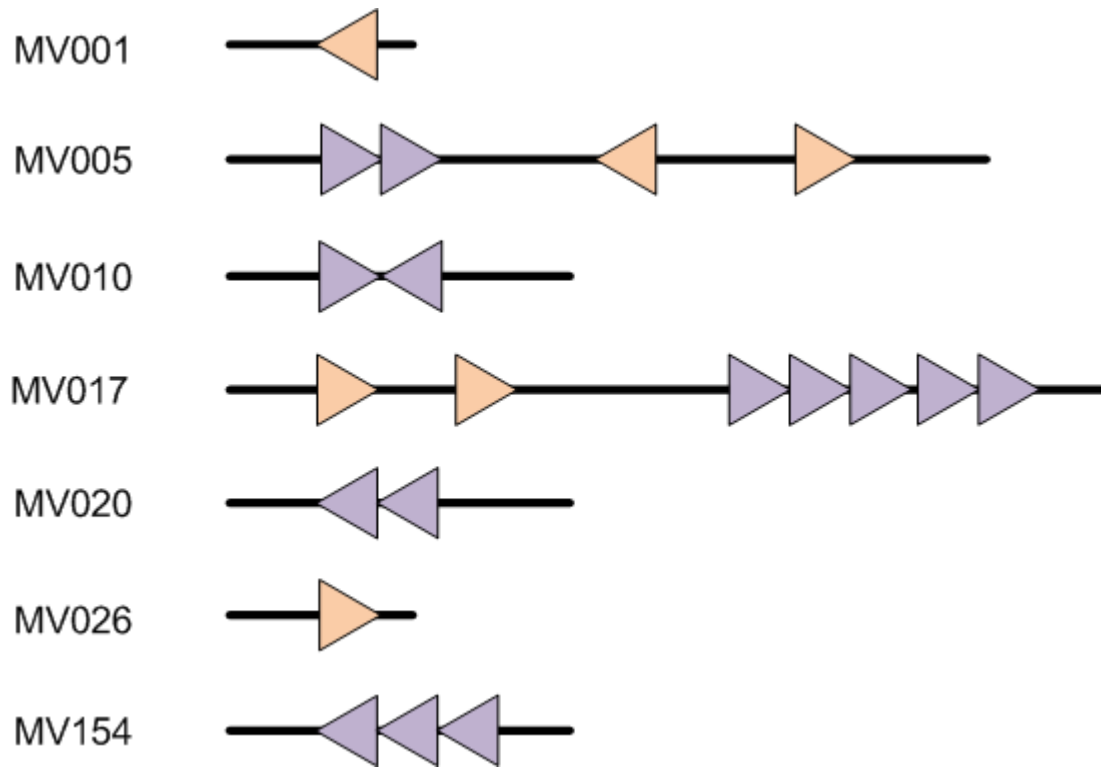

**Fig. S6. Distribution of 20 Lumbrakinase genes on *M. vulgaris* chromosomes.**  
Tandem genes were labeled as purple triangles.
