# Supplementary material for: High-quality genome assembly of Metaphire vulgaris
Source: PeerJ. 2020 Nov 12;8:e10313. doi: 10.7717/peerj.10313 (PMC7666815; doi:10.7717/peerj.10313)
Supplement: Table S1 [file peerj-08-10313-s007.xlsx]

## Sheet: Sheet1
Table S1. Characterization of the 41 M. vulgaris pseudo-chromosomes.
Pseudo-chromosome	length (bp)	No. of scaffolds
MV001	50188689	28
MV002	30913144	11
MV003	24750099	14
MV004	22800624	14
MV005	21666973	13
MV006	20523280	7
MV007	19765952	16
MV008	19740235	9
MV009	18660925	14
MV010	18035184	6
MV011	17873893	18
MV012	17684008	12
MV013	17257282	9
MV014	17074365	11
MV015	16912417	8
MV016	16375932	6
MV017	16344598	7
MV018	16045736	17
MV019	15992478	15
MV020	15536205	16
MV021	15524236	14
MV022	15331039	13
MV023	14998896	25
MV024	14528493	12
MV025	14329759	13
MV026	14237234	13
MV027	14146995	7
MV028	14130172	17
MV029	14036900	10
MV030	13878676	18
MV031	13805013	15
MV032	13684786	14
MV033	13218308	13
MV034	12911712	10
MV035	12894310	21
MV036	12847757	8
MV037	12655327	15
MV038	12219867	10
MV039	11466979	10
MV040	11320194	7
MV041	11001112	8
Total	697309784	524
