# Supplementary material for: High-quality genome assembly of Metaphire vulgaris
Source: PeerJ. 2020 Nov 12;8:e10313. doi: 10.7717/peerj.10313 (PMC7666815; doi:10.7717/peerj.10313)
Supplement: Table S2 [file peerj-08-10313-s008.xlsx]

## Sheet: Sheet1
Table S2. Completeness of the assembled contigs and the high-confidence (HC) gene annotation as assessed by BUSCO.
BUSCOs	Assembled contigs	HC genes
Complete BUSCOs (C)	922 (94.3%)	837 (85.6%)
Complete and single-copy BUSCOs (S)	794 (81.2%)	722 (73.8%)
Complete and duplicated BUSCOs (D)	128 (13.1%)	115 (11.8%)
Fragmented BUSCOs (F)	12 (1.2%)	88 (9.0%)
Missing BUSCOs (M)	44 (4.5%)	53 (5.4%)
Total BUSCO groups searched	978	978
