# Supplementary material for: High-quality genome assembly of Metaphire vulgaris
Source: PeerJ. 2020 Nov 12;8:e10313. doi: 10.7717/peerj.10313 (PMC7666815; doi:10.7717/peerj.10313)
Supplement: Table S3 [file peerj-08-10313-s009.xlsx]

## Sheet: Sheet1
Table S3. Statistics of the genes within three species in Annelida
	Metaphire vulgaris	Helobdella robusta	Hirudinaria manillensis
Gene models (high confidence)	43842	23400	21005
Gene models (low confidence)	6397	-	-
Average gene length	6,154.5 bp	3,920 bp	2,963.1 bp
Average CDS length	1,185.3 bp	1,239 bp	1,293.3 bp
Average exons per gene	5.7	6.1	N/A
