# Supplementary material for: High-quality genome assembly of Metaphire vulgaris
Source: PeerJ. 2020 Nov 12;8:e10313. doi: 10.7717/peerj.10313 (PMC7666815; doi:10.7717/peerj.10313)
Supplement: Table S4 [file peerj-08-10313-s010.xlsx]

## Sheet: Sheet1
Table S4. Characterization of Hox genes in M. vulgaris
Families	Gene name	Gene ID	Location	Orientation
Hox1	Hox1/Lab	MV001018060	MV001:28093405..28098050	+
	Hox1/Lab	MV001022180	MV001:34329063..34329527	-
	Hox1/Lab	MV001023970	MV001:36990543..36992147	+
	Hox1/Lab	MV001028010	MV001:43358406..43360717	-
	Hox1/Lab	MV002020650	MV002:30541138..30547086	-
	Hox1/Lab	MV003016680	MV003:24246418..24246990	-
	Hox1/Lab	MV025008650	MV025:11766376..11767628	+
	Hox1/Lab	MV025010400	MV025:13832101..13834105	+
Hox2	Hox2/Pb	MV001000040	MV001:49127..51238	-
Hox3	Hox3/Zen	MV002020660	MV002:30549061..30550579	-
	Hox3/Zen	MV004012930	MV006:17294369..17320770	-
	Hox3/Zen	MV011003340	MV011:4840018..4840953	-
	Hox3/Zen	MV024004280	MV024:4311372..4312103	-
	Hox3/zen	MV025010380	MV025:13829482..13830303	+
Hox4	Hox4/Dfd	MV001022210	MV001:34365580..34366602	-
	Hox4/Dfd	MV001023960	MV001:36963768..36969719	+
	Hox4/Dfd	MV003016720	MV003:24281024..24282130	-
	Hox4/Dfd	MV005004980	MV004:16947029..16951222	-
	Hox4/Dfd	MV005007520	MV005:8849825..8859555	+
	Hox4/Dfd	MV025010360	MV025:13801299..13808685	+
Hox5	Hox5/Scr	MV006010460	MV005:21377157..21378782	+
	Hox5/Scr	MV011002570	MV011:3358467..3363036	-
	Hox5/Scr	MV020004850	MV020:7236755..7242578	+
	Hox5/Scr	MV024006730	MV024:7586412..7588330	-
	Hox5/Scr	MV030009110	MV030:13661899..13663305	+
	Hox5/Scr	MV037000410	MV037:455275..456941	-
Hox6-8	Hox6/Lox5/Ftz	MV002020740	MV002:30605183..30606155	-
	Hox6/Lox5/Ftz	MV003016760	MV003:24322878..24323390	-
	Hox7/Antp	MV030009090	MV030:13644986..13646922	+
	Lox2	MV001023920	MV001:36820161..36830156	+
	Ubx/Lox4	MV025008600	MV025:11680435..11680767	+
	Ubx/Lox4	MV025010350	MV025:13765284..13767372	+
	Lox2	MV006010480	MV006:17126614..17130791	-
	Lox2	MV025010330	MV025:13673406..13681419	+
Hox9-13(15)	Post2	MV001022300	MV001:34500807..34501064	-
	Post2	MV001023900	MV001:36792872..36806668	+
	Post2	MV005014680	MV005:12836698..12837156	-
	Post2	MV014004490	MV014:5313517..5313855	-
	Post2	MV025008540	MV025:11601486..11613663	+
	Post1	MV005014700	MV005:21370276..21370560	+
	Post1	MV018001930	MV018:2463035..2463478	+
