# Supplementary material for: High-quality genome assembly of Metaphire vulgaris
Source: PeerJ. 2020 Nov 12;8:e10313. doi: 10.7717/peerj.10313 (PMC7666815; doi:10.7717/peerj.10313)
Supplement: Table S5 [file peerj-08-10313-s011.xlsx]

## Sheet: Sheet1
Table S5. Characterization of the Lumbrokinases in M. vulgaris.
Gene	Chr	Start	End	Direction	Sbjct	Identity
MV001010500	MV001	13737058	13743299	-	gi|157931562|gb|ABW04905.1|	63.49
MV005004750	MV005	8445641	8450043	+	gi|157931564|gb|ABW04906.1|	79.24
MV005004760	MV005	8455327	8459553	+	gi|157931564|gb|ABW04906.1|	80.17
MV005004920	MV005	8683470	8683745	-	gi|157931564|gb|ABW04906.1|	84.62
MV005005100	MV005	9119243	9125946	+	gi|157931560|gb|ABW04904.1|	71.58
MV010001890	MV010	2502566	2505675	+	gi|157931564|gb|ABW04906.1|	54.81
MV010001900	MV010	2512437	2515562	-	gi|157931564|gb|ABW04906.1|	53.97
MV017002220	MV017	3290328	3295837	+	gi|38194433|gb|AAR13226.1|	83.88
MV017002510	MV017	3888443	3895620	+	gi|157931564|gb|ABW04906.1|	57.22
MV017003820	MV017	6042155	6046404	+	gi|157931564|gb|ABW04906.1|	61.34
MV017003830	MV017	6055411	6060480	+	gi|157931564|gb|ABW04906.1|	53.21
MV017003840	MV017	6067607	6073620	+	gi|157931564|gb|ABW04906.1|	59.66
MV017003860	MV017	6092567	6099281	+	gi|157931564|gb|ABW04906.1|	53.78
MV017003870	MV017	6106450	6117246	+	gi|157931564|gb|ABW04906.1|	58.4
MV020008660	MV020	12858213	12859839	-	gi|16755859|gb|AAL28118.1|AF433650_1	79.72
MV020008670	MV020	12865296	12869525	-	gi|50346081|gb|AAT74900.1|	76.42
MV026006220	MV026	10010619	10013338	+	gi|157931564|gb|ABW04906.1|	52.31
MV154000010	MV154*	7114	36288	-	gi|157931560|gb|ABW04904.1|	84.31
MV154000020	MV154*	53417	53960	-	gi|157931562|gb|ABW04905.1|	80
MV154000030	MV154*	67532	75597	-	gi|157931560|gb|ABW04904.1|	69
*unanchored contig
